# Supplementary material
Source: HighWire-hosted journal article supplement (https://dmd.aspetjournals.org/highwire/filestream/72655/field_highwire_adjunct_files/0/Supplemental_84640.pdf)
Supplement: Supplemental_84640.pdf [file Supplemental_84640.pdf]

## Supplemental Data

### Hydrolytic Metabolism of Cyanopyrrolidine DPP-4 Inhibitors Mediated by Dipeptidyl Peptidases

Fandi Kong, Xiaoyan Pang, Jihui Zhao, Pan Deng, Mingyue Zheng, Dafang Zhong,  
Xiaoyan Chen.

#### Drug Metabolism and Disposition

**Supplemental Fig. S1.** The typical product ion scan spectra of M0 (A, besigliptin), M2 (B, besigliptin-COOH), and M8-2 (C, besigliptin-amide).

**Supplemental Fig. S2.** The formation of besigliptin-COOH from besigliptin (5  $\mu$ M) in rat plasma with or without saxagliptin (100  $\mu$ M) at 37°C for 3 h (n=3). \*\*\*,  $p < 0.001$  compared with control.

**Supplemental Fig. S3.** Hydrolysis of besigliptin (250 nM) in DPP-4, DPP-2, DPP-8, DPP-9, FAP. Data are displayed as the mean of two separate samples.

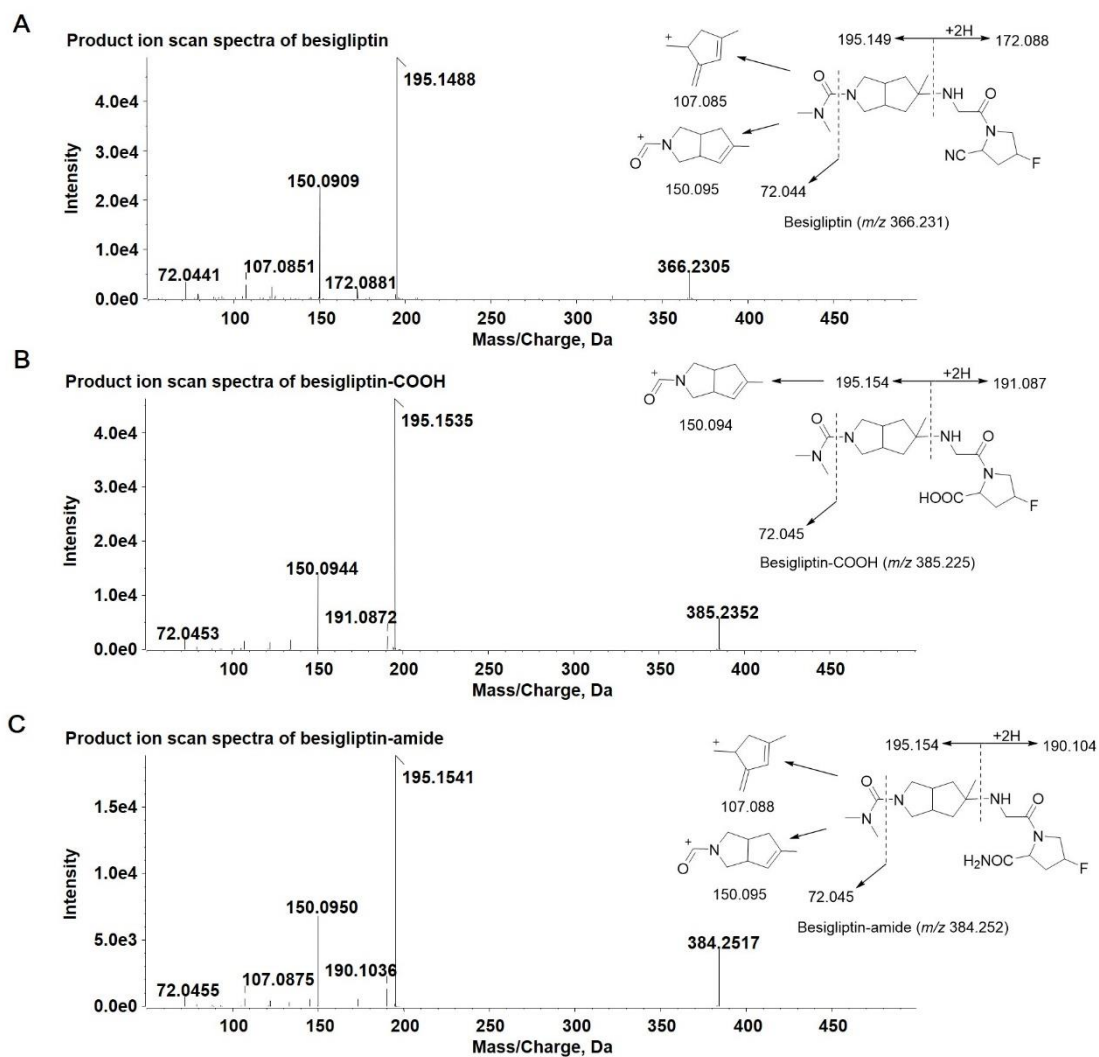

Supplemental Fig. S1

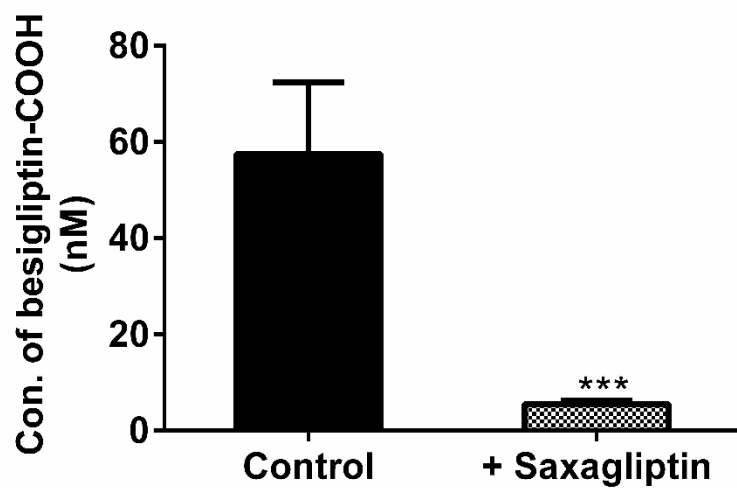

Supplemental Fig. S2

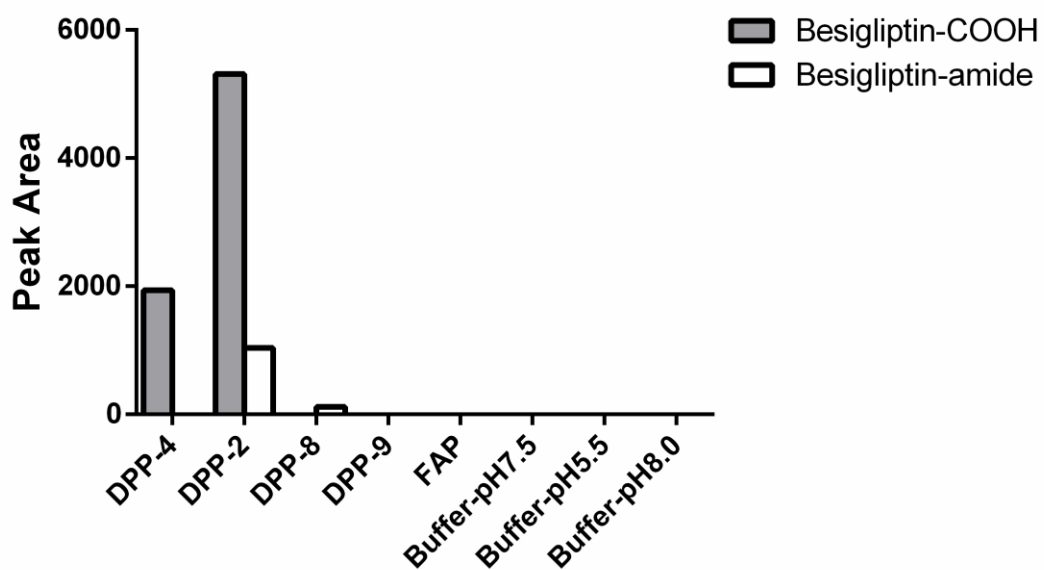

Supplemental Fig. S3
